# Supplementary material for: Management of Adult Patients with Primary Immune Thrombocytopenia (ITP) in Clinical Practice: A Consensus Approach of the Spanish ITP Expert Group
Source: Hindawi journal article supplement (doi:10.1155/2019/4621416), 2019-08-22
Supplement: f1 [file 4621416.f1.pdf]

## Annex. Supplementary material

**Supplementary Table 1.** Results of the different sections of the questionnaire

| Questionnaire section                                                                                                                                                                     | Never % | Sometimes % | Frequently % | Always % | Mean  | Median     | Mode       |
|-------------------------------------------------------------------------------------------------------------------------------------------------------------------------------------------|---------|-------------|--------------|----------|-------|------------|------------|
| <b>Diagnosis</b>                                                                                                                                                                          |         |             |              |          |       |            |            |
| – Do you consider appropriate to initiate the study of thrombocytopenia from a sustained platelet count < 100 x 10 <sup>9</sup> /L and without any other clear cause that may justify it? | 5.0     | 7.5         | 60.0         | 27.5     | 3.100 | Frequently | Frequently |
| – Do you consider appropriate to indicate bone marrow aspiration in case of elderly patients with suspected ITP?                                                                          | 5.0     | 22.5        | 47.5         | 25.0     | 2.925 | Frequently | Frequently |
| – Do you consider appropriate to indicate bone marrow aspiration in all patients with suspected ITP?                                                                                      | 75.0    | 22.5        | 2.5          | 0        | 1.275 | Never      | Never      |
| – Do you consider appropriate to indicate a study of <i>Helicobacter pylori</i> after diagnosis or suspicion of ITP?                                                                      | 22.5    | 32.5        | 45.0         | 0        | 2.225 | Sometimes  | Frequently |
| <b>First-line treatment</b>                                                                                                                                                               |         |             |              |          |       |            |            |
| – Do you consider appropriate to start treatment in an asymptomatic patient and with a platelet count < 20 x 10 <sup>9</sup> /L?                                                          | 2.6     | 28.2        | 43.6         | 25.6     | 2.923 | Frequently | Frequently |
| – Do you consider appropriate to start treatment in a symptomatic patient and with a platelet count > 20 x 10 <sup>9</sup> /L?                                                            | 0       | 7.5         | 35.0         | 57.5     | 3.500 | Always     | Always     |
| – Do you consider appropriate not to exceed 6-7 weeks of treatment in patients treated with corticosteroids?                                                                              | 0       | 15.4        | 53.8         | 30.8     | 3.154 | Frequently | Frequently |
| – Do you consider appropriate to start treatment in an asymptomatic patient and with a platelet count > 20 x10 <sup>9</sup> /L?                                                           | 60.0    | 37.5        | 2.5          | 0        | 1.425 | Never      | Never      |

| Questionnaire section                                                                                                                                        | Never % | Sometimes % | Frequently % | Always % | Mean  | Median              | Mode       |
|--------------------------------------------------------------------------------------------------------------------------------------------------------------|---------|-------------|--------------|----------|-------|---------------------|------------|
| <b>First-treatment (continued)</b>                                                                                                                           |         |             |              |          |       |                     |            |
| – Do you consider appropriate to start treatment in a patient aged > 65 years without comorbidities?                                                         | 15.0    | 47.5        | 25.0         | 12.5     | 2.350 | Sometimes           | Sometimes  |
| – Do you consider appropriate to state that dexamethasone involves any advantage for the patient over prednisone in the first-line treatment of ITP?         | 15.4    | 48.7        | 35.9         | 0        | 2.205 | Sometimes           | Sometimes  |
| – Do you consider appropriate to maintain treatment with corticosteroids at a dose of ≤ 5 mg chronically?                                                    | 56.4    | 38.5        | 5.1          | 0        | 1.487 | Never               | Never      |
| – Do you consider appropriate to select immunoglobulins as a treatment of choice in a patient with ITP with absence of bleeding?                             | 94.9    | 2.6         | 2.6          | 0        | 1.077 | Never               | Never      |
| – Do you consider appropriate to re-treat a patient with corticosteroids within the first 6 months after relapse?                                            | 10.3    | 53.8        | 30.8         | 5.1      | 2.308 | Sometimes           | Sometimes  |
| – If a decrease in platelet count during gradual reduction of corticosteroids is observed, do you consider it appropriate to increase the dose of treatment? | 28.2    | 56.4        | 15.4         | 0        | 1.872 | Sometimes           | Sometimes  |
| – Do you consider appropriate to use steroids in a patient with chronic ITP who had never needed treatment?                                                  | 43.6    | 15.4        | 28.2         | 12.8     | 2.103 | Sometimes           | Never      |
| <b>Second-line treatment</b>                                                                                                                                 |         |             |              |          |       |                     |            |
| – Do you consider appropriate to indicate bone marrow aspiration before starting second-line treatment?                                                      | 15.0    | 17.5        | 42.5         | 25.0     | 2.775 | Frequently          | Frequently |
| – Do you consider appropriate to use thrombopoietin analogues in second-line treatment before splenectomy?                                                   | 0       | 45.0        | 52.5         | 2.50     | 2.575 | Frequently          | Frequently |
| – Do you consider appropriate to indicate thromboembolic prophylaxis during 2 to 4 weeks after splenectomy, if safe platelet levels are maintained?          | 7.5     | 7.5         | 35.0         | 50.0     | 3.275 | Frequently - Always | Always     |
| <b>Second-line treatment (continued)</b>                                                                                                                     |         |             |              |          |       |                     |            |

| Questionnaire section                                                                                                                                                                   | Never % | Sometimes % | Frequently % | Always % | Mean  | Median            | Mode       |
|-----------------------------------------------------------------------------------------------------------------------------------------------------------------------------------------|---------|-------------|--------------|----------|-------|-------------------|------------|
| - Do you consider appropriate to state that the platelet threshold to maintain the minimum dose of thrombopoietin analogues is $> 50 \times 10^9/L$ ?                                   | 5.0     | 32.5        | 42.5         | 20.0     | 2.775 | Frequently        | Frequently |
| - Do you consider appropriate in patients treated with a thrombopoietin analogue with a sustained platelet count $> 100 \times 10^9/L$ , to gradually reduce the dose until withdrawal? | 2.6     | 20.5        | 53.8         | 23.1     | 2.974 | Frequently        | Frequently |
| - In case of treatment failure with a thrombopoietin analogue, do you consider it adequate to start a new line of treatment with another thrombopoietin analogue?                       | 0       | 7.7         | 69.2         | 23.1     | 3.154 | Frequently        | Frequently |
| - Do you consider adequate to swift to second-line treatment in a patient treated with corticosteroids presenting relapse within the first year after response?                         | 23.1    | 38.5        | 33.3         | 5.1      | 2.205 | Sometimes         | Sometimes  |
| - Do you consider appropriate to perform a bone marrow biopsy before starting second-line treatment?                                                                                    | 40.0    | 35.0        | 20.0         | 5.0      | 1.900 | Sometimes         | Never      |
| - Do you consider appropriate to consider a splenectomy if, after 12 months of treatment, the platelet count has not increased up to safe levels?                                       | 5.0     | 50.0        | 45.0         | 0        | 2.400 | Sometimes         | Sometimes  |
| - Do you consider appropriate to indicate platelet antiaggregants if there is a sustained platelet count $> 500 \times 10^9/L$ ?                                                        | 50.0    | 30.0        | 17.5         | 2.5      | 1.725 | Never - Sometimes | Never      |
| - Do you consider appropriate to check the minimum effective dose in patients treated with thrombopoietin analogues with a platelet count $< 50 \times 10^9/L$ ?                        | 33.3    | 28.2        | 30.8         | 7.7      | 2.128 | Sometimes         | Never      |
| - Do you consider appropriate to use rituximab after failure of treatment with thrombopoietin analogues?                                                                                | 7.7     | 56.4        | 33.3         | 2.7      | 2.308 | Sometimes         | Sometimes  |
| <b>PERSISTENT ITP AND REFRACTORY PATIENTS</b>                                                                                                                                           |         |             |              |          |       |                   |            |
| - Do you consider appropriate to start a line of treatment with thrombopoietin analogues in patients with                                                                               | 0       | 2.5         | 62.5         | 35.0     | 3.325 | Frequently        | Frequently |

| Questionnaire section                                                                                                                                                                                                                                                                                                     | Never % | Sometimes % | Frequently % | Always % | Mean  | Median     | Mode       |
|---------------------------------------------------------------------------------------------------------------------------------------------------------------------------------------------------------------------------------------------------------------------------------------------------------------------------|---------|-------------|--------------|----------|-------|------------|------------|
| persistent ITP without response to corticosteroids or who are corticoid-dependent?                                                                                                                                                                                                                                        |         |             |              |          |       |            |            |
| – Do you consider appropriate to start treatment in an asymptomatic patient with persistent ITP and a platelet count < 20 x10 <sup>9</sup> /L?                                                                                                                                                                            | 2.5     | 42.5        | 42.5         | 12.5     | 2.650 | Frequently | Sometimes  |
| – Do you consider appropriate to start treatment in a symptomatic patient with persistent ITP and a platelet count > 20 x10 <sup>9</sup> /L?                                                                                                                                                                              | 7.5     | 12.5        | 32.5         | 47.5     | 3.20  | Frequently | Always     |
| – Do you consider appropriate to indicate a therapeutic abstinence associated with antifibrinolytic agents in refractory patients (to steroids, immunoglobulins, splenectomy, and thrombopoietin analogues) with a platelet count < 20 x 10 <sup>9</sup> /L and without bleeding symptoms if his/her lifestyle allows it? | 5.1     | 41.0        | 43.6         | 10.3     | 2.590 | Frequently | Frequently |
| – Do you consider appropriate to start a line of treatment with rituximab in patients with persistent ITP without response to corticosteroids or who are corticoid-dependent?                                                                                                                                             | 32.5    | 62.5        | 5.0          | 0        | 1.725 | Sometimes  | Sometimes  |
| – Do you consider appropriate to start treatment in a patient with persistent ITP, asymptomatic and with a platelet count > 20 x10 <sup>9</sup> /L?                                                                                                                                                                       | 67.5    | 25.0        | 5.0          | 2.5      | 1.425 | Never      | Never      |
| – Do you consider appropriate to start treatment in a patient with persistent ITP, aged > 65 years, without comorbidities and a platelet count of 20-30 x 10 <sup>9</sup> /L?                                                                                                                                             | 25.0    | 65.0        | 10.0         | 0        | 1.850 | Sometimes  | Sometimes  |
| – Do you consider appropriate to start treatment in a patient with persistent ITP, aged > 65 years, with comorbidities, and a platelet count of 20-30 x 10 <sup>9</sup> /L?                                                                                                                                               | 12.5    | 45.0        | 40.0         | 2.5      | 2.325 | Sometimes  | Sometimes  |
| – Do you consider appropriate to maintain chronic treatment with corticosteroids at doses ≤ 5 mg in patients with persistent ITP, if the platelet count with that treatment is acceptable?                                                                                                                                | 42.5    | 25.0        | 22.5         | 10.0     | 2.000 | Sometimes  | Never      |

| Questionnaire section                                                                                                                                                                                                                        | Never % | Sometimes % | Frequently % | Always % | Mean  | Median    | Mode      |
|----------------------------------------------------------------------------------------------------------------------------------------------------------------------------------------------------------------------------------------------|---------|-------------|--------------|----------|-------|-----------|-----------|
| – In refractory patients to corticosteroids, splenectomy, rituximab and thrombopoietin analogues, do you consider appropriate to select non-steroidal immunosuppressants in monotherapy as the next treatment option?                        | 0       | 55.0        | 40.0         | 5.0      | 2.500 | Sometimes | Sometimes |
| – In refractory patients to steroids, splenectomy, rituximab and thrombopoietin analogues, do you consider appropriate to select non-steroidal immunosuppressants in combination with thrombopoietin analogues as the next treatment option? | 12.5    | 47.5        | 35.0         | 5.0      | 2.325 | Sometimes | Sometimes |
| – In refractory patients to steroids, splenectomy, rituximab and thrombopoietin analogues, do you consider appropriate to select monotherapy with danazol as the next treatment option?                                                      | 7.5     | 72.5        | 20.0         | 0        | 2.125 | Sometimes | Sometimes |
| – In refractory patients to steroids, splenectomy, rituximab and thrombopoietin analogues, do you consider appropriate to select monotherapy with dapsone as the next treatment option?                                                      | 22.5    | 70.0        | 7.5          | 0        | 1.850 | Sometimes | Sometimes |
| – In refractory patients to steroids, splenectomy, rituximab and thrombopoietin analogues, do you consider appropriate to select corticosteroids combined with thrombopoietin analogues as the next treatment option?                        | 15.0    | 52.5        | 30.0         | 2.5      | 2.200 | Sometimes | Sometimes |
| – In refractory patients to steroids, splenectomy, rituximab and thrombopoietin analogues, do you consider appropriate to select danazol combined with thrombopoietin analogues as the next treatment option?                                | 25.0    | 70.0        | 5.0          | 0        | 1.800 | Sometimes | Sometimes |
| – In refractory patients to steroids, splenectomy, rituximab and thrombopoietin analogues, do you consider appropriate to select dapsone combined with                                                                                       | 47.5    | 50.0        | 2.5          | 0        | 1.550 | Sometimes | Sometimes |

| Questionnaire section                                                                                                                                                                | Never % | Sometimes % | Frequently % | Always % | Mean  | Median     | Mode       |
|--------------------------------------------------------------------------------------------------------------------------------------------------------------------------------------|---------|-------------|--------------|----------|-------|------------|------------|
| thrombopoietin analogues as the next treatment option?                                                                                                                               |         |             |              |          |       |            |            |
| <b>Follow-up</b>                                                                                                                                                                     |         |             |              |          |       |            |            |
| – Do you consider mucosal bleeding or severe bleeding as a basic criterion for hospital admission in an adult patient with ITP?                                                      | 0       | 2.6         | 33.3         | 64.1     | 3.615 | Always     | Always     |
| – Do you consider appropriate to educate patients in the recognition of the hemorrhagic symptoms for requesting an appointment for medical consultation?                             | 0       | 2.5         | 7.5          | 90.0     | 3.875 | Always     | Always     |
| – Do you consider appropriate to evaluate every two months a patient with ITP under active treatment with thrombopoietin analogues and a stable platelet count?                      | 7.7     | 35.9        | 43.6         | 12.8     | 2.615 | Frequently | Frequently |
| – Do you consider a platelet count $<10 \times 10^9/L$ without hemorrhage as a basic criterion for hospital admission in an adult patient with ITP?                                  | 17.5    | 45.0        | 25.0         | 12.5     | 2.325 | Sometimes  | Sometimes  |
| – Do you consider a platelet count between 20 and $30 \times 10^9/L$ without hemorrhage as a basic criterion for hospital admission in an adult patient with ITP?                    | 82.5    | 17.5        | 0            | 0        | 1.175 | Never      | Never      |
| – Do you consider appropriate to evaluate every 1 or 2 weeks a patient with ITP under active treatment with thrombopoietin analogues and a stable platelet count?                    | 82.5    | 7.5         | 7.5          | 2.5      | 1.300 | Never      | Never      |
| – Do you consider appropriate to evaluate monthly a patient with ITP under active treatment of thrombopoietin analogues and a stable platelet count?                                 | 17.9    | 33.3        | 41.0         | 7.7      | 2.385 | Sometimes  | Frequently |
| – Do you consider appropriate to evaluate with a frequency higher than 2 months a patient with ITP under active treatment with thrombopoietin analogues and a stable platelet count? | 10.3    | 53.8        | 25.6         | 10.7     | 2.359 | Sometimes  | Sometimes  |

| Questionnaire section                                                                                                                                                              | Never % | Sometimes % | Frequently % | Always % | Mean  | Median     | Mode       |
|------------------------------------------------------------------------------------------------------------------------------------------------------------------------------------|---------|-------------|--------------|----------|-------|------------|------------|
| Follow-up (continued)                                                                                                                                                              |         |             |              |          |       |            |            |
| – Do you consider appropriate to evaluate every 1 or 2 weeks a patient with ITP under active treatment (other than TPOa) and a stable platelet count?                              | 71.8    | 17.9        | 10.3         | 0        | 1.385 | Never      | Never      |
| – Do you consider it appropriate to evaluate every month a patient with ITP under active treatment (other than a TPOa) and a stable platelet count?                                | 37.5    | 40.0        | 20.0         | 2.5      | 1.875 | Sometimes  | Sometimes  |
| – Do you consider it appropriate to evaluate every 2 months a patient with ITP under active treatment (other than TPOa) and a stable platelet count?                               | 17.5    | 40.0        | 40.0         | 2.5      | 2.275 | Sometimes  | Sometimes  |
| – Do you consider appropriate to evaluate more frequently than every 2 months a patient with ITP under active treatment (other than TPOa) and a stable platelet count?             | 10.0    | 52.5        | 30.0         | 7.5      | 2.350 | Sometimes  | Sometimes  |
| <b>Pregnancy</b>                                                                                                                                                                   |         |             |              |          |       |            |            |
| – Do you consider appropriate to initiate work-up studies to exclude ITP with a platelet count between 50 and $<80 \times 10^9/L$ during pregnancy?                                | 0       | 7.5         | 65.0         | 27.5     | 3.200 | Frequently | Frequently |
| – Do you consider appropriate to initiate work-up studies to exclude ITP with a platelet count $< 50 \times 10^9/L$ during pregnancy?                                              | 0       | 2.6         | 10.3         | 87.2     | 3.846 | Always     | Always     |
| – Do you consider appropriate to start treatment during the first trimester of gestation in a patient with vaginal bleeding and a minimum platelet count $< 30 \times 10^9/L$ ?    | 0       | 5.0         | 30.0         | 65.0     | 3.600 | Always     | Always     |
| – Do you consider appropriate to start treatment during the first trimester of gestation in a patient without vaginal bleeding and a minimum platelet count $< 30 \times 10^9/L$ ? | 10.0    | 35.0        | 32.5         | 22.5     | 2.675 | Frequently | Sometimes  |

| Questionnaire section                                                                                                                                            | Never % | Sometimes % | Frequently % | Always % | Mean  | Median              | Mode       |
|------------------------------------------------------------------------------------------------------------------------------------------------------------------|---------|-------------|--------------|----------|-------|---------------------|------------|
| Pregnancy (continued)                                                                                                                                            |         |             |              |          |       |                     |            |
| - Do you consider it appropriate to perform a vaginal delivery with a platelet count > 80 x 10 <sup>9</sup> /L?                                                  | 7.50    | 10.0        | 32.5         | 50.0     | 3.250 | Frequently - Always | Always     |
| - Do you consider appropriate to perform a cesarean section with a platelet count > 50 x 10 <sup>9</sup> /L?                                                     | 10.0    | 32.50       | 35.0         | 22.5     | 2.700 | Frequently          | Frequently |
| - Do you consider appropriate to perform an epidural anesthesia with a platelet count > 80 x 10 <sup>9</sup> /L?                                                 | 0       | 7.50        | 47.5         | 45.0     | 3.375 | Frequently          | Frequently |
| - Do you consider appropriate to use steroids instead of immunoglobulins as the treatment of choice in patients with ITP and pregnancy?                          | 5.0     | 37.50       | 42.5         | 15.0     | 2.675 | Frequently          | Frequently |
| - Do you consider appropriate to perform a vaginal delivery with a platelet count < 80 x 10 <sup>9</sup> /L?                                                     | 2.5     | 50.0        | 40.0         | 7.5      | 2.525 | Sometimes           | Sometimes  |
| - Do you consider appropriate to perform a cesarean section with a platelet count < 50 x 10 <sup>9</sup> /L?                                                     | 40.0    | 40.0        | 12.5         | 7.5      | 1.875 | Sometimes           | Never      |
| - Do you consider appropriate to perform an epidural anesthesia with a platelet count < 80 x 10 <sup>9</sup> /L?                                                 | 67.5    | 27.5        | 5.0          | 0        | 1.375 | Never               | Never      |
| - Do you consider appropriate to use immunoglobulins instead of steroids as the treatment of choice in patients with ITP and pregnancy?                          | 12.5    | 65.0        | 15.0         | 7.5      | 2.175 | Sometimes           | Sometimes  |
| <b>Emergencies, surgery, and safety</b>                                                                                                                          |         |             |              |          |       |                     |            |
| - Do you consider platelet transfusion appropriate in case of severe or life-threatening bleeding?                                                               | 0       | 7.5         | 32.5         | 60.0     | 3.525 | Always              | Always     |
| - Do you consider appropriate to administer platelet transfusion with previous immunoglobulins?                                                                  | 2.5     | 25.0        | 50.0         | 22.5     | 2.925 | Frequently          | Frequently |
| - Do you consider that the use of antifibrinolytic drugs in bleeding is appropriate?                                                                             | 2.5     | 17.5        | 60.0         | 20.0     | 2.975 | Frequently          | Frequently |
| - Do you consider appropriate to use of steroids or immunoglobulins in ITP patients without treatment, but with a lower platelet count than that recommended for | 0       | 17.5        | 47.5         | 35.0     | 3.175 | Frequently          | Frequently |



| Questionnaire section                                                                                                                                                                                                                                    | Never % | Sometimes % | Frequently % | Always % | Mean  | Median     | Mode       |
|----------------------------------------------------------------------------------------------------------------------------------------------------------------------------------------------------------------------------------------------------------|---------|-------------|--------------|----------|-------|------------|------------|
| an elective surgical procedure?                                                                                                                                                                                                                          |         |             |              |          |       |            |            |
| - Do you consider it appropriate to use of thrombopoietin receptor agonists in ITP patients without treatment, but with a lower platelet count than that recommended for an elective surgical procedure?                                                 | 5.0     | 37.5        | 52.5         | 5.0      | 2.575 | Frequently | Frequently |
| - Do you consider appropriate to use thrombopoietin analogues to prepare the patient for splenectomy?                                                                                                                                                    | 0       | 37.5        | 50.0         | 12.5     | 2.750 | Frequently | Frequently |
| - Do you consider that a platelet count of 30-50 x 10 <sup>9</sup> /L is appropriate for surgery with low bleeding risk (e.g. single tooth extraction, localized biopsies with local anesthesia, etc.)?                                                  | 5.0     | 22.5        | 42.5         | 30.0     | 2.975 | Frequently | Frequently |
| - Do you consider that a platelet count of > 50 x 10 <sup>9</sup> /L is appropriate for surgery with low bleeding risk (e.g. single tooth extraction, localized biopsies with local anesthesia, etc.)?                                                   | 12.5    | 32.5        | 40.0         | 15.0     | 2.575 | Frequently | Frequently |
| - Do you consider adequate to give antiplatelet agents to a patient with ITP from a platelet count > 50 x 10 <sup>9</sup> /L?                                                                                                                            | 0.00    | 5.0         | 60.0         | 35.0     | 3.300 | Frequently | Frequently |
| - Do you consider anticoagulant treatment appropriate in an ITP patient from a platelet count > 50 x 10 <sup>9</sup> /L?                                                                                                                                 | 0       | 12.5        | 50.0         | 37.5     | 3.250 | Frequently | Frequently |
| - Do you consider appropriate to use thrombopoietin receptor agonists in ITP patients without active treatment, known responders to steroids and/or immunoglobulins, with a platelet count lower than that recommended for elective surgical procedures? | 42.5    | 42.5        | 15.0         | 0.0      | 1.725 | Sometimes  | Never      |
| - Do you consider appropriate to use, in patients with ITP, the same criteria for secondary prophylaxis with anticoagulants or antiplatelet agents than in patients without ITP?                                                                         | 22.5    | 30.0        | 37.5         | 10.0     | 2.350 | Sometimes  | Frequently |
| - Do you consider adequate to give antiplatelet agents to a patient with ITP from a platelet count 30-50 x 10 <sup>9</sup> /L?                                                                                                                           | 15.0    | 55.0        | 27.5         | 2.5      | 2.175 | Sometimes  | Sometimes  |

| Questionnaire section                                                                                                                      | Never % | Sometimes % | Frequently % | Always % | Mean  | Median                 | Mode       |
|--------------------------------------------------------------------------------------------------------------------------------------------|---------|-------------|--------------|----------|-------|------------------------|------------|
| Emergencies, surgery, and safety (continued)                                                                                               |         |             |              |          |       |                        |            |
| – Do you consider anticoagulant treatment appropriate in a patient with ITP from a platelet of $30-50 \times 10^9/L$ ?                     | 25.0    | 65.0        | 7.5          | 2.5      | 1.875 | Sometimes              | Sometimes  |
| <b>Secondary immune thrombocytopenia</b>                                                                                                   |         |             |              |          |       |                        |            |
| – Do you consider appropriate to manage secondary immune thrombocytopenia in the same way as ITP, if the underlying disease is controlled? | 5.0     | 22.5        | 47.5         | 25.0     | 2.925 | Frequently             | Frequently |
| – Do you consider appropriate to use thrombopoietin analogues as treatment for secondary immune thrombocytopenia?                          | 10.0    | 40.00       | 45.0         | 5.0      | 2.450 | Sometimes - frequently | Frequently |
| – Do you consider appropriate to use rituximab for the treatment of secondary immune thrombocytopenia?                                     | 10.0    | 50.0        | 35.0         | 5.0      | 2.350 | Sometimes              | Sometimes  |

Never: 1; sometimes: 2; frequently: 3; always: 4. TPOa: thrombopoietin analogues.
